# Supplementary material for: Mucolytic Effectiveness of Tyloxapol in Chronic Obstructive Pulmonary Disease - A Double-Blind, Randomized Controlled Trial
Source: PLoS One. 2016 Jun 16;11(6):e0156999. doi: 10.1371/journal.pone.0156999 (PMC4911120; doi:10.1371/journal.pone.0156999)
Supplement: S1 Dataset — (XLSX) [file pone.0156999.s002.xlsx]

## Sheet: Sputum weight
Tyloxapol										Saline
Patient No	Group	Visite	quality (mucoid=1, muco-purulent=2, purulent=3)	pre-processing sputum weight	selected sputum weight	volume of the filtrate	ovrall leucocytes 10^6 Zellen	living leucocytes %		Patient No	Group	Visite	quality (mucoid=1, muco-purulent=2, purulent=3)	pre-processing sputum weight	selected sputum weight	volume of the filtrate	ovrall leucocytes 10^6 Zellen	living leucocytes %
				g	g	ml								g	g	ml
VISITE 1+4,
Patient-202	A	1	1	7.89	5.55	30.58	19.72	85.27		Patient-201	B	1	2	4.97	1.2	6.47	2.3	83.1
Patient-204	A	1								Patient-205	B	1
Patient-206	A	1	1	7.83	3.87	22.56	11.05	95.92		Patient-207	B	1	1	0.63	0.52	2.19	0.43	76.92
Patient-208	A	1	1	1.12	0.86	5.52	0.94	88.24		Patient-211	B	1	1	1.66	0.55	2.92	0.28	57.89
Patient-210	A	1	1	1.01	0.97	4.46	3.1	70.95		Patient-212	B	1	1	0.79	0.63	2.66	1.52	92.98
Patient-215	A	1	1	2.8	1.29	6.69	1.96	75.86		Patient-213	B	1	1	2.25	0.8	4.87	7.13	98.56
Patient-216	A	1	1	5.43	1.21	7.58	0.57	73.33		Patient-214	B	1	1	2.27	1.33	5.22	1.23	82.35
Patient-219	A	1	1	10.07	1.53	8.88	0.48	63.64		Patient-217	B	1	1	2.47	1.94	10.37	1.92	59.46
Patient-227	A	1	2	2.03	0.83	3.76	0.45	29.16		Patient-220	B	1	1	3.9	2.01	10.96	2.41	70.46
Patient-228	A	1	1	12.8	11.91	77.48	1.94	80		Patient-221	B	1	2	0.87	0.56	2.41	0.362	66.67
										Patient-226	B	1
Patient-201	B	4	1	9.41	1.61	9.44	2.69	77.19		Patient-202	A	4	2	2.36	1.52	8.18	13.29	91.39
Patient-205	B	4	1	5.09	4.61	25.19	0.63	40		Patient-204	A	4
Patient-207	B	4	1	3.19	1.63	7.08	1.42	80		Patient-206	A	4	1	3.49	2.12	12.3	1.78	62.07
Patient-211	B	4	1	1.53	1.26	7.91	0.32	50		Patient-208	A	4	2	0.39	0.19	0.88	0.02	60
Patient-212	B	4	1	2.91	2.37	13.1	1.57	95.83		Patient-210	A	4	1	1.08	0.33	2.07	0.69	100
Patient-213	B	4	1	3.25	2.07	11.93	1.97	60.6		Patient-215	A	4	1	3.09	1.27	8.16	0.94	43.48
Patient-214	B	4	2	7.44	3.34	15.35	3.6	53.19		Patient-216	A	4	1	2.19	1.76	11.34	1.3	65.22
Patient-217	B	4	1	3.57	2.75	15.29	1.53	50		Patient-219	A	4	1	5.02	1.77	11.87	0.53	33.33
Patient-220	B	4	1	5.31	4.68	25.27	1.64	76.92		Patient-227	A	4	3	1.64	0.62	3	0.225	26.67
Patient-221	B	4	2	3.62	2.75	13.76	3.51	54.9		Patient-228	A	4	1	4	3.66	19.46	0.48	100
Patient-226	B	4
VISITE 2+5,
Patient-202	A	2	3	7.4	5.88					Patient-201	B	2	2	6.71	2.16
Patient-204	A	2								Patient-205	B	2
Patient-206	A	2	2	4.01	2.78					Patient-207	B	2	1	1.17	0.98
Patient-208	A	2	1	0.49	0					Patient-211	B	2	1	0.72	0.42
Patient-210	A	2	1	1.49	1.25					Patient-212	B	2	2	0.68	0.49
Patient-215	A	2	1	6.93	1.3					Patient-213	B	2	2	1.36	1.05
Patient-216	A	2	1	1.1	0					Patient-214	B	2	1	2.11	1.8
Patient-219	A	2	2	2.2	1.29					Patient-217	B	2	1	2.72	2.04
Patient-227	A	2	2	2.99	2.26					Patient-220	B	2	1	3.31	2.85
Patient-228	A	2	1	6.49	4.88					Patient-221	B	2	2	1.72	1.45
										Patient-226	B	2
Patient-201	B	5	2	6.38	4.47					Patient-202	A	5	2	3.27	3.21
Patient-205	B	5	1	6.78	4.52					Patient-204	A	5
Patient-207	B	5	1	3.4	2					Patient-206	A	5	1	1.45	0.9
Patient-211	B	5	1	3.68	3.1					Patient-208	A	5
Patient-212	B	5	1	4	3.12					Patient-210	A	5	2	0.88	0.86
Patient-213	B	5	2	4.24	2.12					Patient-215	A	5	2	7.5	1.99
Patient-214	B	5	2	5.51	3.65					Patient-216	A	5	1	1.24	0.96
Patient-217	B	5	1	0.9	0.76					Patient-219	A	5	2	7.19	3.53
Patient-220	B	5	1	3.46	1.94					Patient-227	A	5	2	1.72	1.27
Patient-221	B	5	1	2.31	1.39					Patient-228	A	5	1	1.71	1.45
Patient-226	B	5
VISITE 3+6,
Patient-202	A	3	2	4.61	3.33	8.07	4.35	92.59		Patient-201	B	3	2	4.72	1.98	7.51	1.61	7.44
Patient-204	A	3								Patient-205	B	3
Patient-206	A	3	2	6.38	4.5	28.74	2.73	63		Patient-207	B	3	1	0.54	0.42	1.6	0.32	75.6
Patient-208	A	3								Patient-211	B	3	1	2.9	2.24	14	1.33	57.89
Patient-210	A	3	1	1.44	1.16	7	2.52	79.16		Patient-212	B	3	2	0.53	0.29	0.8	0.16	90
Patient-215	A	3	1	14.99	0.9	3.9	0.35	55.55		Patient-213	B	3	2	1.62	1.27	2.79	4.67	95.84
Patient-216	A	3	1	0.46	0.23	0.9	0.26	63.16		Patient-214	B	3	1	2.66	0.98	3.47	1.42	55.56
Patient-219	A	3	2	6.21	1.6	7.65	0.68	44.44		Patient-217	B	3	1	2.55	2.28	12.63	1.13	44.44
Patient-227	A	3	1	2.78	1.99	10.32	1.7	27.27		Patient-220	B	3	1	2.53	1.88	9.41	2.92	72.58
Patient-228	A	3	1	5.86	4.53	23.62	0.47	75		Patient-221	B	3	1	2.72	1.2	7.42	1.08	55.17
										Patient-226	B	3
Patient-201	B	6	2	6.97	1.54	5.28	1.48	51.79		Patient-202	A	6	3	6.11	6.04	21.37	38.25	95.25
Patient-205	B	6	1	5.29	3.9	23.43	0.46	100		Patient-204	A	6
Patient-207	B	6	2	2.15	1.7	10.32	1.19	21.74		Patient-206	A	6	2	2.19	1.18	5.89	2.79	85.26
Patient-211	B	6	1	2.64	1.58	9.76	1.17	25		Patient-208	A	6
Patient-212	B	6	1	1.9	1.24	6.72	4.33	37		Patient-210	A	6	2	0.64	0.5	1.6	0.35	68.18
Patient-213	B	6	1	0.92	0.51	1.76	0.22	72		Patient-215	A	6	1	5.88	4.52	24.36	3.41	32.15
Patient-214	B	6	2	3.43	2.05	9.67	19.77	91.93		Patient-216	A	6
Patient-217	B	6	1	1.91	1.13	6.42	0.48	60		Patient-219	A	6	1	1.84	1.37	8.23	0.58	42.86
Patient-220	B	6	1	3.29	2.34	12.58	2.39	71		Patient-227	A	6	2	2.96	2.31	10.33	3.41	45.45
Patient-221	B	6	2	1.38	0.42	1.52	0.29	81.58		Patient-228	A	6	1	1.71	1.23	5.39	0.13	80
Patient-226	B	6

## Sheet: Sputum Diff. abs.
Tyloxapol										Saline
Patient No	Group	Visite	macrophages	segmented neutrophils	banded neutrophils	lymphocytes	eosinophils	basophils	total neutrophil granulocates	Patient No	Group	Visite	macrophages	segmented neutrophils	banded neutrophils	lymphocytes	eosinophils	basophils	total neutrophil granulocates
			cells x106	cells x107	cells x108	cells x109	cells x110	cells x111	cells x112				cells x106	cells x107	cells x108	cells x109	cells x110	cells x111	cells x112
VISITE 1+4,
202	A	1	1.5283	16.0718	0.7888	1.3311	0	0	16.8606	201	B	1	0.299	1.7825	0.13225	0.0805	0.00575	0	1.91475
204	A	1								205	B	1
206	A	1	2.67963	8.12175	0.138125	0.1105	0	0	8.25988	207	B	1	0.061275	0.353675	0.0086	0.00645	0	0	0.362275
208	A	1	0.27025	0.6345	0.01175	0.0235	0	0	0.64625	211	B	1	0.153725	0.0905882	0.0027451	0.027451	0.0054902	0	0.0933333
210	A	1	1.333	1.57325	0.0465	0.06975	0.0775	0	1.61975	212	B	1	0.19	1.2464	0.0532	0.019	0.0114	0	1.2996
215	A	1	0.1666	1.7297	0.0343	0.0147	0.0147	0	1.764	213	B	1	0.74865	5.93573	0.24955	0.089125	0.10695	0	6.18528
216	A	1	0.471675	0.055575	0.015675	0.027075	0	0	0.07125	214	B	1	0.49815	0.667275	0.046125	0.015375	0.003075	0	0.7134
219	A	1	0.2832	0.1632	0.0072	0.0216	0.0048	0	0.1704	217	B	1	0.2928	1.5648	0.048	0.0144	0	0	1.6128
227	A	1								220	B	1	0.307275	1.91595	0.138575	0.018075	0.030125	0	2.05452
228	A	1	0.26675	1.455	0.0291	0.17945	0.0097	0	1.4841	221	B	1	0.06154	0.27512	0.008145	0.015385	0.00181	0	0.283265
										226	B	1
201	B	4	0.746475	1.78885	0.0538	0.087425	0.01345	0	1.84265	202	A	4	0.2658	10.931	0.897075	1.1961	0	0	11.8281
205	B	4	0.482087	0.120522	0.00547826	0.021913	0	0	0.126	204	A	4
207	B	4	0.4899	0.83425	0.06035	0.0355	0	0	0.8946	206	A	4	0.4539	1.22375	0.0623	0.0356	0.00445	0	1.28605
211	B	4	0.0554331	0.258268	0.00251969	0	0.00377953	0	0.260787	208	A	4	0.00520833	0.0123611	0.000833333	0.00131944	0.000277778	0	0.0131944
212	B	4	0.10205	1.3973	0.03925	0.00785	0.02355	0	1.43655	210	A	4	0.070725	0.56925	0.036225	0.001725	0.012075	0	0.605475
213	B	4	0.42355	1.43317	0.0394	0.02955	0.044325	0	1.47257	215	A	4	0.0987	0.8178	0.01645	0.00705	0	0	0.83425
214	B	4	2.358	1.161	0.036	0.045	0	0	1.197	216	A	4	0.15925	1.0725	0.05525	0.0065	0.0065	0	1.12775
217	B	4	0.3213	1.0863	0.06885	0.042075	0.011475	0	1.15515	219	A	4
220	B	4	0.4633	0.984	0.0205	0.1148	0.0328	0.0246	1.0045	227	A	4	0.0185625	0.159188	0.003375	0.0421875	0.0016875	0	0.162562
221	B	4	0.903825	2.41312	0.096525	0.078975	0.01755	0	2.50965	228	A	4	0.0252	0.3084	0.0036	0.1428	0	0	0.312
226	B	4
VISITE 3+6,
202	A	3	1.14187	2.7405	0.348	0.10875	0.010875	0	3.0885	201	B	3	0.4025	1.11492	0	0.060375	0.00805	0	1.11492
204	A	3								205	B	3
206	A	3	0.880425	1.63118	0.102375	0.09555	0.01365	0.006825	1.73355	207	B	3	0.0832	0.2072	0.012	0.0128	0.004	0.0008	0.2192
208	A	3								211	B	3
210	A	3	1.7577	0.6741	0.0063	0.0567	0.0252	0	0.6804	212	B	3	0.122532	0.0303797	0	0.00708861	0	0	0.0303797
215	A	3	0.063	0.284375	0.000875	0.00175	0	0	0.28525	213	B	3	3.9228	0.478675	0.011675	0.198475	0.058375	0	0.49035
216	A	3	0.06565	0.1846	0.00325	0.0065	0	0	0.18785	214	B	3	0.3692	0.9798	0.0355	0.03195	0.00355	0	1.0153
219	A	3								217	B	3	0.234475	0.850325	0.025425	0.014125	0.00565	0	0.87575
227	A	3	0.07225	1.513	0.02975	0.085	0	0	1.54275	220	B	3	0.2993	2.3287	0.1606	0.0657	0.0657	0	2.4893
228	A	3	0.066975	0.203275	0.001175	0.1927	0.005875	0	0.20445	221	B	3	0.3348	0.6561	0.0378	0.0432	0.0081	0	0.6939
										226	B	3
201	B	6	0.333	0.8732	0.1628	0.0888	0.0111	0.0111	1.036	202	A	6	0.95625	33.8513	2.19937	1.24313	0	0	36.0506
205	B	6	0.140421	0.266316	0.0145263	0.0338947	0.00484211	0	0.280842	204	A	6
207	B	6	0.026775	1.09777	0.056525	0.002975	0.00595	0	1.1543	206	A	6	0.578925	2.01578	0.1674	0.0279	0	0	2.18318
211	B	6								208	A	6
212	B	6	0.6928	3.51812	0.075775	0.010825	0.032475	0	3.5939	210	A	6	0.128625	0.217	0.00175	0.002625	0	0	0.21875
213	B	6	0.04895	0.1639	0.00385	0.0022	0.0011	0	0.16775	215	A	6	0.332475	2.92407	0.0682	0.08525	0	0	2.99227
214	B	6	1.1862	17.8918	0.642525	0.049425	0	0	18.5344	216	A	6
217	B	6	0.2352	0.198	0.0144	0.0288	0.0036	0	0.2124	219	A	6
220	B	6	0.627375	1.7447	0	0.017925	0	0	1.7447	227	A	6	0.127875	3.12015	0.01705	0.144925	0	0	3.1372
221	B	6	0.0464	0.238525	0.002175	0.00145	0.00145	0	0.2407	228	A	6	0.010725	0.08255	0.0052	0.0312	0.000325	0	0.08775
226	B	6

## Sheet: Sputum Diff. %
Tyloxapol										Saline
Patient No	Group	Visite	macrophages	segmented neutrophils	banded neutrophils	lymphocytes	eosinophils	basophils	total neutrophil granulocates	Patient No	Group	Visite	macrophages	segmented neutrophils	banded neutrophils	lymphocytes	eosinophils	basophils	total neutrophil granulocates
			%	%	%	%	%	%	%				%	%	%	%	%	%	%
VISITE 1+4,
202	A	1	7.75	81.5	4	6.75	0	0	85.5	201	B	1	13	77.5	5.75	3.5	0.25	0	83.25
204	A	1								205	B	1
206	A	1	24.25	73.5	1.25	1	0	0	74.75	207	B	1	14.25	82.25	2	1.5	0	0	84.25
208	A	1	28.75	67.5	1.25	2.5	0	0	68.75	211	B	1	54.902	32.3529	0.980392	9.80392	1.96078	0	33.3333
210	A	1	43	50.75	1.5	2.25	2.5	0	52.25	212	B	1	12.5	82	3.5	1.25	0.75	0	85.5
215	A	1	8.5	88.25	1.75	0.75	0.75	0	90	213	B	1	10.5	83.25	3.5	1.25	1.5	0	86.75
216	A	1	82.75	9.75	2.75	4.75	0	0	12.5	214	B	1	40.5	54.25	3.75	1.25	0.25	0	58
219	A	1	59	34	1.5	4.5	1	0	35.5	217	B	1	15.25	81.5	2.5	0.75	0	0	84
227	A	1								220	B	1	12.75	79.5	5.75	0.75	1.25	0	85.25
228	A	1	13.75	75	1.5	9.25	0.5	0	76.5	221	B	1	17	76	2.25	4.25	0.5	0	78.25
										226	B	1
201	B	4	27.75	66.5	2	3.25	0.5	0	68.5	202	A	4	2	82.25	6.75	9	0	0	89
205	B	4	76.5217	19.1304	0.869565	3.47826	0	0	20	204	A	4
207	B	4	34.5	58.75	4.25	2.5	0	0	63	206	A	4	25.5	68.75	3.5	2	0.25	0	72.25
211	B	4	17.3228	80.7087	0.787402	0	1.1811	0	81.4961	208	A	4	26.0417	61.8056	4.16667	6.59722	1.38889	0	65.9722
212	B	4	6.5	89	2.5	0.5	1.5	0	91.5	210	A	4	10.25	82.5	5.25	0.25	1.75	0	87.75
213	B	4	21.5	72.75	2	1.5	2.25	0	74.75	215	A	4	10.5	87	1.75	0.75	0	0	88.75
214	B	4	65.5	32.25	1	1.25	0	0	33.25	216	A	4	12.25	82.5	4.25	0.5	0.5	0	86.75
217	B	4	21	71	4.5	2.75	0.75	0	75.5	219	A	4
220	B	4	28.25	60	1.25	7	2	1.5	61.25	227	A	4	8.25	70.75	1.5	18.75	0.75	0	72.25
221	B	4	25.75	68.75	2.75	2.25	0.5	0	71.5	228	A	4	5.25	64.25	0.75	29.75	0	0	65
226	B	4
VISITE 3+6,
202	A	3	26.25	63	8	2.5	0.25	0	71	201	B	3	25	69.25		3.75	0.5	0	69.25
204	A	3								205	B	3
206	A	3	32.25	59.75	3.75	3.5	0.5	0.25	63.5	207	B	3	26	64.75	3.75	4	1.25	0.25	68.5
208	A	3								211	B	3
210	A	3	69.75	26.75	0.25	2.25	1	0	27	212	B	3	76.5823	18.9873	0	4.43038	0	0	18.9873
215	A	3	18	81.25	0.25	0.5	0	0	81.5	213	B	3	84	10.25	0.25	4.25	1.25	0	10.5
216	A	3	25.25	71	1.25	2.5	0	0	72.25	214	B	3	26	69	2.5	2.25	0.25	0	71.5
219	A	3								217	B	3	20.75	75.25	2.25	1.25	0.5	0	77.5
227	A	3	4.25	89	1.75	5	0	0	90.75	220	B	3	10.25	79.75	5.5	2.25	2.25	0	85.25
228	A	3	14.25	43.25	0.25	41	1.25	0	43.5	221	B	3	31	60.75	3.5	4	0.75	0	64.25
										226	B	3
201	B	6	22.5	59	11	6	0.75	0.75	70	202	A	6	2.5	88.5	5.75	3.25	0	0	94.25
205	B	6	30.5263	57.8947	3.15789	7.36842	1.05263	0	61.0526	204	A	6
207	B	6	2.25	92.25	4.75	0.25	0.5	0	97	206	A	6	20.75	72.25	6	1	0	0	78.25
211	B	6								208	A	6
212	B	6	16	81.25	1.75	0.25	0.75	0	83	210	A	6	36.75	62	0.5	0.75	0	0	62.5
213	B	6	22.25	74.5	1.75	1	0.5	0	76.25	215	A	6	9.75	85.75	2	2.5	0	0	87.75
214	B	6	6	90.5	3.25	0.25	0	0	93.75	216	A	6
217	B	6	49	41.25	3	6	0.75	0	44.25	219	A	6
220	B	6	26.25	73	0	0.75	0	0	73	227	A	6	3.75	91.5	0.5	4.25	0	0	92
221	B	6	16	82.25	0.75	0.5	0.5	0	83	228	A	6	8.25	63.5	4	24	0.25	0	67.5
226	B	6

## Sheet: CBA  
Tyloxapol								Saline
Patient No	Group	Visite	IL-6	IL-8	IL-1beta	Smoker		Patient No	Group	Visite	IL-6	IL-8	IL-1beta	Smoker
			pg/ml	pg/ml	pg/ml						pg/ml	pg/ml	pg/ml
VISITE 1+4,
202	A	1	6547.28	141065	17897.4	1		201	B	1	2095.52	81328	1896.42	1
204	A	1						205	B	1				1
206	A	1	3741.54	51295.4	486.25	1		207	B	1	3429.42	33255	382.53	1
208	A	1	910.55	48530.7	276.78	0		211	B	1	110.72	14043.3	516.51	0
210	A	1	5906.83	98645.2	968.64	1		212	B	1	4712.14	63770.5	736.96	1
215	A	1	1429.46	22104.8	594.92	0		213	B	1	2600.21	61040.6	2263.47	0
216	A	1	358.47	7623.24	201.94	0		214	B	1	3429.42	70574.9	480.92	1
219	A	1	759.65	31843.8	400.19	0		217	B	1	882.02	42282.9	142.58	0
227	A	1	2547.38	60972.2	594.92	1		220	B	1	4040.39	18653.4	437.68	1
228	A	1	390.48	5117.11	85.36	1		221	B	1	1459.48	32541.4	371.84	1
								226	B	1
201	B	4	1722.62	52156.1	1404.5	1		202	A	4	5756.97	75534.8	31921.4	1
205	B	4	464.82	4669.28	81.5	1		204	A	4
207	B	4	6615.09	48799.3	361.41	1		206	A	4	2010.96	36277.8	361.41	1
211	B	4	83.4	3810.86	88	0		208	A	4	113.85	8361.97	170.21	0
212	B	4	6683.61	35496	533.72	1		210	A	4	425	25534.3	539.58	1
213	B	4	1248.39	54528.7	740.89	0		215	A	4	234.68	6810.31	178.01	0
214	B	4	2709.14	55757.4	502.55	1		216	A	4	863.47	10225.7	400.19	0
217	B	4	1112.58	18653.4	189.67	0		219	A	4	22.95	3306.41	138.8	0
220	B	4	2228.94	26797.1	322.22	1		227	A	4	3394.46	40913.4	854.35	1
221	B	4	1585.76	59284.5	1025.69	1		228	A	4	462.24	5275.88	30.96	1
226	B	4
VISITE 3+6,
202	A	3	7486.87	209158	16134.8	1		201	B	3	7037.24	169033	2356.68	1
204	A	3						205	B	3				1
206	A	3	3536.47	44184.3	275.15	1		207	B	3	7183.97	56382.6	418.56	1
208	A	3				0		211	B	3	17.18	3715.46	196.95	0
210	A	3	1371.21	36521.6	2045.98	1		212	B	3	1704.91	50170.1	748.79	1
215	A	3	891.43	12783.8	365.55	0		213	B	3	5168.14	339898	2970.75	0
216	A	3	2298.75	25397.6	353.26	0		214	B	3	1851.85	74683.2	2195.95	1
219	A	3	1414.68	60972.2	494.33	0		217	B	3	1315.25	17143	121.06	0
227	A	3	3224.93	32718.7	442.58	1		220	B	3	2851.68	16350	270.3	1
228	A	3	297.82	4483.2	47.2	1		221	B	3	1851.77	23818.4	958.59	1
								226	B	3
201	B	6	2822.59	78680.6	2970.75	1		202	A	6	9599.76	65220.2	46538.3	1
205	B	6	192.72	4304.63	23.27	1		204	A	6
207	B	6	189.13	25127	669.58	1		206	A	6	3722.37	54584.4	854.35	1
211	B	6	321.28	29206.5	467.82	0		208	A	6				0
212	B	6	1066.8	73841.7	1348.12	1		210	A	6	2370.71	61637.7	373.96	1
213	B	6	9500.55	31162	318.51	0		215	A	6	346.34	6951.23	337.43	0
214	B	6	13691.6	51746.3	9711.34	1		216	A	6				0
217	B	6	2031.78	26227.8	209.6	0		219	A	6	50.68	3240.04	106.61	0
220	B	6	1385.56	16436	257.73	1		227	A	6	10763.9	41364.6	1555.52	1
221	B	6	1301.61	63058.4	322.22	1		228	A	6	682.18	8713.51	34.71	1
226	B	6

## Sheet: ELISA
Tyloxapol									Saline
Patient No	Group	Visite	Human MUC 5B	Human MUC 5AC	Elastase 2 ELA2 Human	Human MMP-9	Human LTB4		Patient No	Group	Visite	Human MUC 5B	Human MUC 5AC	Elastase 2 ELA2 Human	Human MMP-9	Human LTB4
			ng/ml	pg/ml	ng/ml	ng/ml	pg/ml					ng/ml	pg/ml	ng/ml	ng/ml	pg/ml
VISITE 1+4,
202	A	1	0.312	78.13	15.65	207.35	30000		201	B	1	0.312	78.13	45.74	191.57	9049.5
204	A	1							205	B	1
206	A	1	3.7	756.26	34.67	208.82	6245.3		207	B	1	0.312	78.13	40.68	141.83	1540.3
208	A	1	10.61	78.13	47.14	235.6			211	B	1	0.312	78.13	42.19	117.8	1205
210	A	1	11.41	78.13	47.18	246.11	9402.9		212	B	1	8.2	78.13	59.42	185.66	1363.8
215	A	1	0.312	78.13	51.34	227.14	4370.2		213	B	1	50.32	78.13	46.81	256.56	4872.1
216	A	1	0.312	78.13	38.94	121.74	8970.2		214	B	1	0.312	78.13	38.13	57.36	4566.5
219	A	1	4.55	78.13	43.8	196.52	2700.2		217	B	1	11.11	78.13	39.74	131.73	1956.4
227	A	1	0.312	78.13	39.55	204.48	4126.1		220	B	1	6.89	78.13	51.91	204.9	4891.4
228	A	1	2.94	78.13	33.88	27.19	1126.6		221	B	1	0.312	78.13	27.42	207.18	1691.3
									226	B	1
201	B	4	0.312	78.13	47.59	174.7	6355.3		202	A	4	0.312	78.13	0.06	258.27	7927.5
205	B	4	0.312	78.13	40.41	0.156			204	A	4
207	B	4	0.312	78.13	43.9	186.06	4643		206	A	4	3.76	78.13	30.34	127.56	5513.6
211	B	4	0.312	78.13	24.98	59.46	812.4		208	A	4	0.312	78.13	45.72	85.85
212	B	4	7.89	78.13	52.13	213.36	2961.7		210	A	4	0.312	78.13	36.56	242.62	10075.2
213	B	4	9.46	78.13	48.19	247.38	6091.3		215	A	4	5.73	78.13	46.32	125.87	1611
214	B	4	16.96	78.13	53.05	98.52	5262.8		216	A	4	21.87	1222.89	28.91	154.1	3182.4
217	B	4	0.312	78.13	25.28	115.11	2264.1		219	A	4	0.312	78.13	24.78	93.78	1276.7
220	B	4	0.312	78.13	46.2	146.82	2481.9		227	A	4	0.312	78.13	47.94	230.2	2476.6
221	B	4	0.312	78.13	50.15	232.86	5051		228	A	4	0.312	78.13	14.04	0.156	480.7
226	B	4
VISITE 3+6,
202	A	3	0.312	78.13	40.47	254.83	30000		201	B	3	0.312	78.13	42.84	212.91	24832.4
204	A	3							205	B	3
206	A	3	0.312	78.13	27.51	155.85	6235.5		207	B	3	0.312	78.13	37.43	169	1654.7
208	A	3							211	B	3	0.312	78.13	34.63	72	982
210	A	3	0.312	78.13	43.38	252.52	7408.5		212	B	3	7.31	78.13	52.49	214.24	727.2
215	A	3	3.2	78.13	48.43	196.83	4111.2		213	B	3	29.57	78.13	40.92	275.04	4509.1
216	A	3	32	2631.76	53.33	232.53	17876.5		214	B	3	8.52	78.13	54.77	187.55	9296.1
219	A	3	0.312	78.13	42.32	242.85	2061.6		217	B	3	6.37	1074.57	14.65	71.65	1742.2
227	A	3	0.312	78.13	41.56	210.78	3063		220	B	3	3.95	78.13	47.18	190.93	2378.2
228	A	3	0.312	78.13	47.08	16.22	895.1		221	B	3	0.312	78.13	47.86	191.49	4248.1
									226	B	3
201	B	6	44.33	2051.49	50.55	233.36	13439.2		202	A	6	0.312	78.13	0.06	224.14	11153.7
205	B	6	6.67	78.13	39.42	0.156			204	A	6
207	B	6	0.312	78.13	19.04	92.93	1489.3		206	A	6	17.23	78.13	48	217.14	6138.7
211	B	6	0.312	78.13	28.22	155.31	2442.5		208	A	6
212	B	6	9.34	78.13	47.49	246.94	8666.5		210	A	6	6.95	78.13	41.13	244.19	1448
213	B	6	21.81	2869.66	58.5	234.29	2145.7		215	A	6	0.312	78.13	19.79	133.13	1388.1
214	B	6	0.312	78.13	0.06	259.79	30000		216	A	6
217	B	6	0.312	78.13	29.69	123.96	1924.4		219	A	6	0.312	78.13	26.19	130.73	1618.5
220	B	6	0.312	78.13	32.03	79.46	3573.9		227	A	6	0.312	78.13	42.8	266.48	8557.8
221	B	6	0.312	78.13	51.74	191.6	5106.1		228	A	6	0.312	78.13	15.98	15.5	885.9
226	B	6

## Sheet: Lufu pre lysis
Tyloxapol													Saline
Patient No	Group	Visite	Time	FVC	FVC	FEV1	FEV1	FEV1/FVC	MEF 25	RV	RV/TLC		Patient No	Group	Visite	Time	FVC	FVC	FEV1	FEV1	FEV1/FVC	MEF 25	RV	RV/TLC
				L	%	L	%	L	%	%	%						L	%	L	%	L	%	%	%
VISITE 1+4,
Patient-202	A	1	pre lysis	2.83	64	1.19	35	41.97	16	328	191		Patient-201	B	1	pre lysis	3.06	90	2.11	72	68.94	32	169	143
Patient-204	A	1	pre lysis										Patient-205	B	1	pre lysis	3.55	99	1.71	56	48.25	21	246	160
Patient-206	A	1	pre lysis	3.43	76	2.1	58	61.27	21	106	119		Patient-207	B	1	pre lysis	4.28	86	2.32	58	54.31	24	228	167
Patient-208	A	1	pre lysis	2.16	78	1.14	49	46.86	18	159	139		Patient-211	B	1	pre lysis	2.14	69	0.97	41	45.05	17	166	157
Patient-210	A	1	pre lysis	1.03	39	0.69	31	49.72	27	224	184		Patient-212	B	1	pre lysis	1.75	54	0.71	26	40.76	12	220	178
Patient-215	A	1	pre lysis	4.84	92	2.2	53	45.35	20	217	149		Patient-213	B	1	pre lysis	3.65	86	1.62	49	44.46	15	150	130
Patient-216	A	1	pre lysis	2.28	67	1.53	58	64.71	24	97	122		Patient-214	B	1	pre lysis	3.75	86	2.75	82	73.33	45	145	127
Patient-219	A	1	pre lysis	3.27	81	2.35	77	71.95	37	123	120		Patient-217	B	1	pre lysis	2.54	83	1.68	65	66.19	26	151	139
Patient-227	A	1	pre lysis	3.42	77	2.14	60	58.75	25	105	112		Patient-220	B	1	pre lysis	2.96	72	1.73	53	56.42	31	248	176
Patient-228	A	1	pre lysis	3.71	76	1.98	50	51.28	22	259	180		Patient-221	B	1	pre lysis	3.19	79	2.54	78	79.8	48	121	129
													Patient-226	B	1	pre lysis
Patient-201	B	4	pre lysis	3.27	96	2.14	73	65.51	27	136	123		Patient-202	A	4	pre lysis	2.48	57	0.98	29	39.44	15	234	180
Patient-205	B	4	pre lysis	3.21	90	1.67	54	52.13	21	248	167		Patient-204	A	4	pre lysis
Patient-207	B	4	pre lysis	4.68	94	2.4	60	51.35	23	187	145		Patient-206	A	4	pre lysis	3.11	69	1.65	46	47.51	18	122	127
Patient-211	B	4	pre lysis	2.35	76	0.91	38	38.82	19	169	153		Patient-208	A	4	pre lysis	2.24	81	1.15	49	47.5	17	253	164
Patient-212	B	4	pre lysis	2.14	66	0.85	31	39.39	13	219	168		Patient-210	A	4	pre lysis	1.83	70	0.97	44	49.17	16	176	155
Patient-213	B	4	pre lysis	3.6	85	1.66	50	46.03	18	144	129		Patient-215	A	4	pre lysis	4.69	89	2.03	49	43.2	20	192	143
Patient-214	B	4	pre lysis	2.26	52	1.57	47	69.62	14	147	159		Patient-216	A	4	pre lysis	1.82	53	1.28	49	70.65	13	101	140
Patient-217	B	4	pre lysis	2.56	84	1.67	65	65.15	23	199	156		Patient-219	A	4	pre lysis	3.33	83	2.51	82	73.24	47	118	115
Patient-220	B	4	pre lysis	2.63	64	1.5	46	43.76	18	183	150		Patient-227	A	4	pre lysis	3.72	83	2.46	70	62.51	29	183	145
Patient-221	B	4	pre lysis	3.32	82	2.36	73	71.02	39	95	110		Patient-228	A	4	pre lysis	3.85	79	2.04	52	50.37	23	260	177
Patient-226	B	4	pre lysis
VISITE 2+5,
Patient-202	A	2	pre lysis	3	68	1.27	37	42.38	16	522	208		Patient-201	B	2	pre lysis	3.26	96	2.19	75	67.26	28	106	106
Patient-204	A	2	pre lysis										Patient-205	B	2	pre lysis	3.23	90	1.65	54	50.96	19	229	161
Patient-206	A	2	pre lysis	3.29	73	1.94	54	58.83	21	86	107		Patient-207	B	2	pre lysis	4.62	93	2.55	64	55.29	24	195	149
Patient-208	A	2	pre lysis	2.21	80	1.14	49	48.97	18	215	157		Patient-211	B	2	pre lysis	2.18	71	0.91	38	41.63	15	158	153
Patient-210	A	2	pre lysis	1.99	60	0.88	32	44.47	11	150	152		Patient-212	B	2	pre lysis	2.1	65	0.79	29	37.68	12	247	175
Patient-215	A	2	pre lysis	5.31	101	2.48	60	46.66	27	208	140		Patient-213	B	2	pre lysis	3.5	82	1.65	50	47.17	15	162	138
Patient-216	A	2	pre lysis	2.2	64	1.48	56	66.43	24	56	93		Patient-214	B	2	pre lysis	2.92	67	1.91	57	65.38	25	159	148
Patient-219	A	2	pre lysis	3.23	81	2.39	78	73.88	42	139	128		Patient-217	B	2	pre lysis	2.23	73	1.25	48	56.15	17	288	186
Patient-227	A	2	pre lysis	3.22	72	1.94	55	52.31	19	201	156		Patient-220	B	2	pre lysis	3.05	74	1.7	52	55.75	22	233	172
Patient-228	A	2	pre lysis	4.18	85	2.15	55	49.6	23	215	158		Patient-221	B	2	pre lysis	3.16	78	2.48	76	78.63	42	114	126
													Patient-226	B	2	pre lysis
Patient-201	B	5	pre lysis	3.02	89	1.92	66	63.77	21	144	133		Patient-202	A	5	pre lysis	3.03	69	1.26	37	41.62	16	413	198
Patient-205	B	5	pre lysis	2.97	83	1.42	46	47.6	20	303	185		Patient-204	A	5	pre lysis
Patient-207	B	5	pre lysis	4.63	93	2.51	62	51.76	23	192	144		Patient-206	A	5	pre lysis	3.18	71	1.86	52	52.41	19	133	132
Patient-211	B	5	pre lysis	2.07	67	0.84	36	40.76	18	188	165		Patient-208	A	5	pre lysis	2.26	81	1.16	50	51.55	21	175	148
Patient-212	B	5	pre lysis	1.56	48	0.83	30	46.48	21	209	175		Patient-210	A	5	pre lysis	1.59	60	0.88	40	45.38	14	205	164
Patient-213	B	5	pre lysis	3.46	81	1.56	47	45.19	16	165	140		Patient-215	A	5	pre lysis	4.84	92	2.22	53	45.87	24	389	190
Patient-214	B	5	pre lysis	3.69	85	2.66	79	72.17	42	155	132		Patient-216	A	5	pre lysis	2.08	61	1.5	57	71.91	42	115	140
Patient-217	B	5	pre lysis	2.56	84	1.61	62	62.95	22	157	142		Patient-219	A	5	pre lysis	3.06	76	2.21	72	67.44	40	118	117
Patient-220	B	5	pre lysis	3.13	75	1.59	48	46.35	18	222	162		Patient-227	A	5	pre lysis	3.65	82	2.29	65	56.99	31	145	128
Patient-221	B	5	pre lysis	3.3	81	2.51	77	69.75	51	116	118		Patient-228	A	5	pre lysis	4.22	86	2.23	57	50.76	22	241	165
Patient-226	B	5	pre lysis
VISITE 3+6,
Patient-202	A	3	pre lysis	2.92	66	1.22	36	39.06	16	660	215		Patient-201	B	3	pre lysis	2.92	86	1.98	68	67.57	30	146	136
Patient-204	A	3	pre lysis										Patient-205	B	3	pre lysis	2.27	63	1	32	41.94	14	301	197
Patient-206	A	3	pre lysis	3.45	77	1.88	52	53.74	30	111	120		Patient-207	B	3	pre lysis	4.25	85	2.46	61	57.44	19	192	154
Patient-208	A	3	pre lysis	2.3	83	1.22	52	47.77	21	195	147		Patient-211	B	3	pre lysis	2.29	74	1.07	45	42.72	24	171	150
Patient-210	A	3	pre lysis	2.13	81	1	46	46.33	12	167	146		Patient-212	B	3	pre lysis	1.4	43	0.66	24	41.23	10	247	187
Patient-215	A	3	pre lysis	5.22	99	2.25	54	43.06	21	218	145		Patient-213	B	3	pre lysis	3.14	74	1.39	42	43.65	15	193	155
Patient-216	A	3	pre lysis	2.01	59	1.4	53	64.7	19	95	126		Patient-214	B	3	pre lysis	3.57	82	2.71	81	75.82	55	154	133
Patient-219	A	3	pre lysis	1	25	0.86	28	29.06	43	143	135		Patient-217	B	3	pre lysis	2.59	85	1.65	64	63.95	23	178	149
Patient-227	A	3	pre lysis	3.54	79	2.3	65	59.23	27	169	141		Patient-220	B	3	pre lysis	2.32	56	1.57	48	49.62	36	192	158
Patient-228	A	3	pre lysis	3.81	78	2.04	52	51.45	20	244	174		Patient-221	B	3	pre lysis	3.34	82	2.68	82	76.87	55	108	115
													Patient-226	B	3	pre lysis
Patient-201	B	6	pre lysis	3.14	92	2.09	72	66.73	29	159	137		Patient-202	A	6	pre lysis	2.25	51	0.89	26	33.77	13	372	199
Patient-205	B	6	pre lysis	2.93	82	1.41	46	48.02	18	277	180		Patient-204	A	6	pre lysis
Patient-207	B	6	pre lysis	4.46	90	2.39	60	53.64	24	200	154		Patient-206	A	6	pre lysis	3.17	70	1.77	49	51.1	20	123	128
Patient-211	B	6	pre lysis	1.94	63	0.88	37	45.43	17	173	165		Patient-208	A	6	pre lysis	2.22	80	1.17	50	47.25	21	260	164
Patient-212	B	6	pre lysis	2.13	66	0.96	35	36.57	15	189	149		Patient-210	A	6	pre lysis	1.92	73	1.01	46	52.54	15	153	149
Patient-213	B	6	pre lysis	3.07	72	1.38	42	42.7	14	162	143		Patient-215	A	6	pre lysis	4.51	86	2.01	48	44.54	22	239	156
Patient-214	B	6	pre lysis	3	69	2.4	71	80.05	60	169	150		Patient-216	A	6	pre lysis	2.09	61	1.36	52	61.54	22	111	134
Patient-217	B	6	pre lysis	2.39	79	1.53	59	63.79	21	221	167		Patient-219	A	6	pre lysis	3.31	83	2.4	78	67.22	40	119	113
Patient-220	B	6	pre lysis	3.37	82	1.66	51	38.85	18	189	137		Patient-227	A	6	pre lysis	3.61	81	2.31	65	60.78	24	105	109
Patient-221	B	6	pre lysis	3.22	80	2.49	77	72.87	52	76	93		Patient-228	A	6	pre lysis	3.95	81	2.07	53	49.21	20	178	147
Patient-226	B	6	pre lysis

## Sheet: Lufu post lysis
Tyloxapol													Saline
Patient No	Group	Visite	Time	FVC	FVC	FEV1	FEV1	FEV1/FVC	MEF 25	RV	RV/TLC		Patient No	Group	Visite	Time	FVC	FVC	FEV1	FEV1	FEV1/FVC	MEF 25	RV	RV/TLC
				L	%	L	%	L	%	%	%						L	%	L	%	L	%	%	%
VISITE 1+4,
Patient-202	A	1	post lysis	3.16	72	1.42	42	45.01	20	507	205		Patient-201	B	1	post lysis	2.82	83	2.06	71	71.89	27	156	142
Patient-204	A	1	post lysis										Patient-205	B	1	post lysis	3.94	110	2.02	66	51.21	34	212	143
Patient-206	A	1	post lysis	3.36	74	2.2	61	65.64	28	161	149		Patient-207	B	1	post lysis	4.72	95	2.82	70	58.36	29	206	150
Patient-208	A	1	post lysis	2.27	82	1.19	51	47.42	19	161	137		Patient-211	B	1	post lysis	2.47	80	1.12	47	41.54	20	154	140
Patient-210	A	1	post lysis	1.13	43	0.81	37	54.77	34	203	176		Patient-212	B	1	post lysis	3.01	92	1.13	41	37.69	18	180	138
Patient-215	A	1	post lysis	5.26	100	2.57	62	48.76	25	213	142		Patient-213	B	1	post lysis	4.08	96	1.96	59	48.16	3	134	116
Patient-216	A	1	post lysis	2.29	67	1.54	59	60.74	27	93	115		Patient-214	B	1	post lysis	2.54	59	1.81	54	71.31	24	148	152
Patient-219	A	1	post lysis	3.35	84	2.5	82	74.55	47	120	117		Patient-217	B	1	post lysis	2.67	88	1.69	65	63.14	24	175	146
Patient-227	A	1	post lysis	3.75	84	2.53	72	65.38	32	157	136		Patient-220	B	1	post lysis	3.3	80	1.71	53	51.69	23	178	150
Patient-228	A	1	post lysis	4.47	91	2.65	67	59.17	22	234	162		Patient-221	B	1	post lysis	3.41	84	2.6	80	76.15	34	122	126
													Patient-226	B	1	post lysis
Patient-201	B	4	post lysis	3.43	101	2.44	84	71.07	39	131	117		Patient-202	A	4	post lysis	3.35	76	1.28	38	38.31	17	344	184
Patient-205	B	4	post lysis	3.92	110	2.37	77	60.33	33	219	145		Patient-204	A	4	post lysis
Patient-207	B	4	post lysis	4.99	100	2.79	69	55.81	25	174	134		Patient-206	A	4	post lysis	2.99	66	1.81	50	53.94	22	112	124
Patient-211	B	4	post lysis	2.58	84	1.11	47	42.89	22	158	144		Patient-208	A	4	post lysis	2.21	79	1.15	49	45.85	16	233	158
Patient-212	B	4	post lysis	2.97	91	1.24	45	41.65	19	192	143		Patient-210	A	4	post lysis	2.07	78	1.03	47	44.76	16	183	148
Patient-213	B	4	post lysis	3.95	93	1.9	57	48.08	22	142	122		Patient-215	A	4	post lysis	5.27	100	2.54	61	48.25	24	191	138
Patient-214	B	4	post lysis	2.67	62	1.93	57	72.46	29	147	149		Patient-216	A	4	post lysis	2.13	62	1.56	59	73.26	25	98	129
Patient-217	B	4	post lysis	2.8	92	1.7	66	60.89	24	161	137		Patient-219	A	4	post lysis	3.4	85	2.51	82	69.99	41	116	111
Patient-220	B	4	post lysis	2.7	66	1.49	46	43.92	20	202	157		Patient-227	A	4	post lysis	2.91	65	1.91	54	64.77	23	165	158
Patient-221	B	4	post lysis	3.32	82	2.54	78	74.82	41	129	130		Patient-228	A	4	post lysis	4.22	86	2.39	61	56.7	27	233	166
Patient-226	B	4	post lysis
VISITE 2+5,
Patient-202	A	2	post lysis	3.02	69	1.18	35	39.14	14	416	198		Patient-201	B	2	post lysis	3.39	100	2.5	86	73.65	41	135	120
Patient-204	A	2	post lysis										Patient-205	B	2	post lysis	3.83	107	2.1	68	54.9	24	194	139
Patient-206	A	2	post lysis	3.36	75	2.12	59	63.18	21	112	123		Patient-207	B	2	post lysis	4.83	97	2.93	73	59.87	28	200	147
Patient-208	A	2	post lysis	2.21	79	1.18	51	53.6	19	177	150		Patient-211	B	2	post lysis	2.49	81	1.05	44	41.94	20	145	141
Patient-210	A	2	post lysis	2.22	84	0.97	44	43.67	15	172	147		Patient-212	B	2	post lysis	3.02	93	1.21	44	40.09	18	196	143
Patient-215	A	2	post lysis	5.43	103	2.58	62	47.32	24	359	177		Patient-213	B	2	post lysis	4.04	95	1.96	59	48.5	18	138	118
Patient-216	A	2	post lysis	2.32	68	1.62	61	69.78	29	84	115		Patient-214	B	2	post lysis	2.79	64	2.04	61	73.31	34	147	146
Patient-219	A	2	post lysis	3.66	91	2.73	89	74.54	59	128	115		Patient-217	B	2	post lysis	2.5	82	1.42	55	56.81	19	213	162
Patient-227	A	2	post lysis	3.43	77	2.15	61	60.45	25	185	153		Patient-220	B	2	post lysis	2.95	72	1.66	51	56.22	22	202	166
Patient-228	A	2	post lysis	4.42	90	2.53	64	57.23	28	238	164		Patient-221	B	2	post lysis	3.34	82	2.77	85	82.96	64	121	126
													Patient-226	B	2	post lysis
Patient-201	B	5	post lysis	3.26	96	2.38	82	72.94	39	143	127		Patient-202	A	5	post lysis	3.06	70	1.35	40	44.18	16	760	220
Patient-205	B	5	post lysis	3.67	102	2.05	67	55.97	22	169	132		Patient-204	A	5	post lysis
Patient-207	B	5	post lysis	4.85	97	2.74	68	54.38	24	174	134		Patient-206	A	5	post lysis	3.23	72	1.94	54	56.25	21	116	124
Patient-211	B	5	post lysis	2.23	72	1.03	43	44.33	19	177	156		Patient-208	A	5	post lysis	2.21	80	1.18	50	48.47	14	270	167
Patient-212	B	5	post lysis	2.71	83	1.15	42	41.62	19	188	146		Patient-210	A	5	post lysis	2.09	79	1.15	52	49.57	17	205	154
Patient-213	B	5	post lysis	3.7	87	1.83	55	48.19	23	85	92		Patient-215	A	5	post lysis	5.11	97	2.41	58	47.12	26	269	161
Patient-214	B	5	post lysis	3.48	80	2.51	75	72.13	65	152	134		Patient-216	A	5	post lysis	2.04	59	1.38	53	67.78	21	120	143
Patient-217	B	5	post lysis	2.61	86	1.71	66	66.57	22	145	135		Patient-219	A	5	post lysis	3.41	85	2.47	81	67.81	45	113	108
Patient-220	B	5	post lysis	3.63	88	1.81	56	45.2	22	208	148		Patient-227	A	5	post lysis	3.27	73	2.09	59	60.09	23	146	138
Patient-221	B	5	post lysis	3.46	86	2.86	88	78.38	75	46	62		Patient-228	A	5	post lysis	4.62	94	2.55	65	55.16	27	223	156
Patient-226	B	5	post lysis
VISITE 3+6,
Patient-202	A	3	post lysis	3.95	90	1.54	45	38.35	13	732	210		Patient-201	B	3	post lysis	3.22	95	2.41	83	74.28	41	143	127
Patient-204	A	3	post lysis										Patient-205	B	3	post lysis	3.26	91	1.61	52	49.17	18	254	168
Patient-206	A	3	post lysis	3.22	71	1.98	55	57.23	21	135	135		Patient-207	B	3	post lysis	5.23	105	3.04	76	57.96	20	183	134
Patient-208	A	3	post lysis	2.36	85	1.22	52	51.84	17	245	164		Patient-211	B	3	post lysis	2.47	80	1.15	49	40.52	25	153	136
Patient-210	A	3	post lysis	1.9	72	0.98	45	45.47	13	173	149		Patient-212	B	3	post lysis	2.86	88	1.19	43	40.08	15	183	140
Patient-215	A	3	post lysis	5.45	104	2.49	60	45.61	25	404	184		Patient-213	B	3	post lysis	4.03	95	1.75	53	43.36	15	125	112
Patient-216	A	3	post lysis	2.29	67	1.68	64	71.96	33	96	123		Patient-214	B	3	post lysis	3.22	74	2.46	73	76.24	42	151	138
Patient-219	A	3	post lysis	1.87	47	1.49	49	79.72	35	125	153		Patient-217	B	3	post lysis	2.74	90	1.77	68	64.69	23	138	129
Patient-227	A	3	post lysis	3.95	89	2.62	74	64.06	32	172	138		Patient-220	B	3	post lysis	2.84	69	1.55	48	41.23	20	197	148
Patient-228	A	3	post lysis	3.9	80	2.22	56	56.82	23	230	171		Patient-221	B	3	post lysis	3.38	84	2.75	85	81.34	66	87	103
													Patient-226	B	3	post lysis
Patient-201	B	6	post lysis	3.38	100	2.48	85	73.28	31	142	124		Patient-202	A	6	post lysis	2.78	63	1.06	31	38.13	17	211	168
Patient-205	B	6	post lysis	3.7	103	2.1	68	56.79	25	221	150		Patient-204	A	6	post lysis
Patient-207	B	6	post lysis	4.69	94	2.69	67	57.42	25	190	146		Patient-206	A	6	post lysis	3.06	68	1.84	51	56.21	19	132	137
Patient-211	B	6	post lysis	2.18	70	0.98	41	38.1	22	153	142		Patient-208	A	6	post lysis	2.26	81	1.2	51	47.77	15	317	173
Patient-212	B	6	post lysis	2.73	84	1.19	43	39.35	24	180	139		Patient-210	A	6	post lysis	2	76	1.04	47	51.85	16	205	162
Patient-213	B	6	post lysis	3.43	81	1.67	51	45.28	21	151	130		Patient-215	A	6	post lysis	4.87	93	2.3	55	47.21	25	239	156
Patient-214	B	6	post lysis	2.78	64	2.12	63	76.26	58	190	162		Patient-216	A	6	post lysis	2.22	65	1.53	58	65.13	30	98	123
Patient-217	B	6	post lysis	2.55	84	1.69	65	66.32	24	223	164		Patient-219	A	6	post lysis	3.53	88	2.63	86	68.1	43	118	107
Patient-220	B	6	post lysis	3.7	90	1.81	56	44.47	20	183	138		Patient-227	A	6	post lysis	3.78	85	2.44	69	63.71	25	61	76
Patient-221	B	6	post lysis	3.35	83	2.67	82	76.17	57	30	45		Patient-228	A	6	post lysis	4.62	94	2.72	69	58.9	26	190	144
Patient-226	B	6	post lysis

## Sheet: Lufu 30 min
Tyloxapol													Saline
Patient No	Group	Visite	Time	FVC	FVC	FEV1	FEV1	FEV1/FVC	MEF 25	RV	RV/TLC		Patient No	Group	Visite	Time	FVC	FVC	FEV1	FEV1	FEV1/FVC	MEF 25	RV	RV/TLC
				L	%	L	%	L	%	%	%						L	%	L	%	L	%	%	%
VISITE 1+4,
Patient-202	A	1	30 min	2.24	51	0.96	28	40.83	16	847	230		Patient-201	B	1	30 min	3.34	98	2.5	86	74.92	43	149	128
Patient-204	A	1											Patient-205	B	1	30 min	3.86	108	1.81	59	46.98	28	227	149
Patient-206	A	1	30 min	3.25	72	2.08	58	61.17	26	330	197		Patient-207	B	1	30 min	4.85	97	2.83	71	57.38	26	202	147
Patient-208	A	1	30 min	1.63	58	0.76	32	46.42	16	167	163		Patient-211	B	1	30 min	2.56	83	1.26	53	43.14	23	154	135
Patient-210	A	1	30 min	1.83	69	0.84	38	46.03	12	149	150		Patient-212	B	1	30 min	3.11	96	1.29	47	41.67	17	186	139
Patient-215	A	1	30 min	5.18	99	2.7	65	51.48	24	267	159		Patient-213	B	1	30 min	4.15	98	1.99	60	47.91	19	121	109
Patient-216	A	1	30 min	2.05	60	1.35	51	64.46	23	115	139		Patient-214	B	1	30 min	3.04	70	2.22	66	73.24	31	140	137
Patient-219	A	1	30 min	3.33	83	2.49	81	74.84	38	119	117		Patient-217	B	1	30 min	2.86	94	1.84	71	64.3	23	177	142
Patient-227	A	1	30 min	3.46	78	2.39	67	67.61	28	184	153		Patient-220	B	1	30 min	3.06	74	1.64	50	53.52	20	224	170
Patient-228	A	1	30 min	3.86	79	2.14	54	55.4	23	263	181		Patient-221	B	1	30 min	3.54	87	2.77	85	78.28	41	126	125
													Patient-226	B	1
Patient-201	B	4	30 min	2.97	87	2.17	74	73.11	33	159	141		Patient-202	A	4	30 min	3.47	79	1.35	40	39.01	17	375	187
Patient-205	B	4	30 min	3.72	104	2	65	53.77	25	289	168		Patient-204	A	4
Patient-207	B	4	30 min	4.89	98	2.7	67	55.33	24	196	145		Patient-206	A	4	30 min	3.29	73	2.18	61	61.48	23	124	127
Patient-211	B	4	30 min	1.67	54	0.69	29	41.07	10	216	182		Patient-208	A	4	30 min	2.42	87	1.18	50	47.35	16	115	118
Patient-212	B	4	30 min	2.62	80	1.1	40	42.18	15	197	152		Patient-210	A	4	30 min	1.68	64	0.85	39	41.9	12	176	153
Patient-213	B	4	30 min	3.6	85	1.64	50	45.54	17	166	138		Patient-215	A	4	30 min	5.08	97	2.43	58	47.74	23	180	133
Patient-214	B	4	30 min	3.11	72	2.35	70	75.68	37	148	140		Patient-216	A	4	30 min	2.23	65	1.57	60	70.57	25	104	130
Patient-217	B	4	30 min	2.55	84	1.49	58	58.2	44	136	132		Patient-219	A	4	30 min	3.47	87	2.65	87	71.52	47	115	108
Patient-220	B	4	30 min	2.01	49	1.04	32	37.69	14	176	161		Patient-227	A	4	30 min	2.96	66	1.98	56	62.36	21	150	147
Patient-221	B	4	30 min	3.38	83	2.66	82	74.35	59	128	126		Patient-228	A	4	30 min	4.27	87	2.45	62	57.33	25	230	164
Patient-226	B	4
VISITE 2+5,
Patient-202	A	2	30 min	2.7	61	1.03	30	38.08	14	773	224		Patient-201	B	2	30 min	3.45	102	2.57	88	74.51	39	133	118
Patient-204	A	2											Patient-205	B	2	30 min	3.8	106	2.07	67	54.28	20	204	143
Patient-206	A	2	30 min	3.22	72	1.96	55	60.87	21	106	122		Patient-207	B	2	30 min	5.19	104	2.96	74	56.97	23	188	137
Patient-208	A	2	30 min	1.89	68	1.01	43	49.05	13	248	171		Patient-211	B	2	30 min	2.73	89	1.26	53	46.16	21	140	133
Patient-210	A	2	30 min	1.98	75	0.81	37	40.73	12	178	155		Patient-212	B	2	30 min	3.16	97	1.38	50	43.7	20	186	138
Patient-215	A	2	30 min	5.55	106	2.7	65	48.57	24	290	161		Patient-213	B	2	30 min	3.94	93	1.99	60	50.46	22	118	110
Patient-216	A	2	30 min	2.23	65	1.55	59	63.51	24	210	164		Patient-214	B	2	30 min	2.46	57	1.81	54	73.46	32	128	145
Patient-219	A	2	30 min	3.61	90	2.73	89	75.68	52	132	118		Patient-217	B	2	30 min	2.5	82	1.43	55	57.09	18	185	153
Patient-227	A	2	30 min	3.32	74	2.07	59	58.92	25	250	174		Patient-220	B	2	30 min	3	73	1.7	52	56.8	22	213	168
Patient-228	A	2	30 min	4.42	90	2.53	64	57.23	28	238	164		Patient-221	B	2	30 min	3.42	84	2.82	87	82.57	64	85	101
													Patient-226	B	2
Patient-201	B	5	30 min	2.85	84	2.05	70	71.97	30	159	144		Patient-202	A	5	30 min	2.92	67	1.27	37	43.5	18	341	191
Patient-205	B	5	30 min	3.46	97	1.77	58	51.23	19	247	162		Patient-204	A	5
Patient-207	B	5	30 min	4.57	92	2.53	63	54.28	23	183	144		Patient-206	A	5	30 min	3.26	72	2.01	56	55.2	20	112	118
Patient-211	B	5	30 min	2.1	68	0.8	34	38.14	18	187	165		Patient-208	A	5	30 min	2.33	84	1.18	50	46.12	19	234	157
Patient-212	B	5	30 min	2.45	75	1.04	38	37.48	17	231	157		Patient-210	A	5	30 min	1.88	71	1.02	46	46.15	17	196	155
Patient-213	B	5	30 min	3.88	91	1.91	58	49.15	20	122	113		Patient-215	A	5	30 min	5.16	98	2.48	60	48.06	26	495	201
Patient-214	B	5	30 min	3.51	81	2.55	76	72.6	55	154	135		Patient-216	A	5	30 min	2.14	62	1.44	55	67.32	24	113	137
Patient-217	B	5	30 min	1.05	35	0.92	36	34.58	53	176	146		Patient-219	A	5	30 min	3.45	86	2.52	82	66.79	43	116	108
Patient-220	B	5	30 min	3.51	84	1.77	54	42.64	21	202	144		Patient-227	A	5	30 min	2.9	65	1.88	53	58.63	22	120	130
Patient-221	B	5	30 min	3.46	85	2.79	86	78.99	55	104	112		Patient-228	A	5	30 min	4.28	87	2.37	60	55.42	28	213	159
Patient-226	B	5
VISITE 3+6,
Patient-202	A	3	30 min	3.33	76	1.18	35	34.02	10	490	200		Patient-201	B	3	30 min	3.29	97	2.47	85	75.19	39	147	128
Patient-204	A	3											Patient-205	B	3	30 min	3.37	94	1.7	55	50.39	17	287	174
Patient-206	A	3	30 min	3.21	71	1.96	54	58.2	21	122	130		Patient-207	B	3	30 min	4.87	98	3.01	75	61.76	27	193	144
Patient-208	A	3	30 min	2.27	82	1.19	51	44.7	17	223	152		Patient-211	B	3	30 min	2.61	85	1.2	51	40.1	26	144	129
Patient-210	A	3	30 min	1.48	56	0.71	32	39.94	12	225	173		Patient-212	B	3	30 min	3.2	98	1.23	45	37.83	13	175	132
Patient-215	A	3	30 min	5.41	103	2.58	62	47.61	24	201	136		Patient-213	B	3	30 min	3.89	92	1.85	56	46.72	17	147	124
Patient-216	A	3	30 min	2.11	62	1.49	57	65.87	24	100	127		Patient-214	B	3	30 min	2.94	68	2.25	67	76.53	52	144	141
Patient-219	A	3	30 min	1.5	37	1.09	36	57.41	17	120	151		Patient-217	B	3	30 min	2.7	89	1.76	68	65.31	26	86	100
Patient-227	A	3	30 min	3.21	72	2.17	61	64.34	27	136	135		Patient-220	B	3	30 min	2.66	65	1.49	46	46.33	20	229	168
Patient-228	A	3	30 min	3.82	78	2.12	54	55.49	24	251	179		Patient-221	B	3	30 min	3.46	86	2.83	87	80.1	62	88	100
													Patient-226	B	3
Patient-201	B	6	30 min	3.25	96	2.38	82	73.21	39	151	131		Patient-202	A	6	30 min	2.81	64	1.16	34	41.44	17	250	177
Patient-205	B	6	30 min	3.49	97	1.83	60	52.55	21	248	162		Patient-204	A	6
Patient-207	B	6	30 min	4.52	91	2.58	64	57.03	26	199	152		Patient-206	A	6	30 min	3.32	74	2.09	58	58.4	23	125	127
Patient-211	B	6	30 min	1.6	52	0.64	27	32.77	17	174	165		Patient-208	A	6	30 min	2.43	87	1.29	55	50.65	18	209	151
Patient-212	B	6	30 min	2.76	85	1.15	42	41.78	16	281	168		Patient-210	A	6	30 min	1.68	64	0.9	41	49.39	16	196	164
Patient-213	B	6	30 min	3.58	84	1.73	52	48.21	20	156	134		Patient-215	A	6	30 min	4.94	94	2.38	57	48.21	26	244	156
Patient-214	B	6	30 min	2.4	55	1.75	52	72.88	34	186	169		Patient-216	A	6	30 min	2.2	64	1.52	58	66.29	27	119	136
Patient-217	B	6	30 min	2.63	86	1.7	66	61.23	27	159	137		Patient-219	A	6	30 min	3.52	88	2.54	83	66.5	43	146	121
Patient-220	B	6	30 min	3.47	84	1.77	54	45.65	20	202	148		Patient-227	A	6	30 min	3.31	74	2.13	60	61.78	24	62	83
Patient-221	B	6	30 min	3.19	79	2.58	79	77.54	74	81	99		Patient-228	A	6	30 min	4.11	84	2.41	61	57.11	25	218	161
Patient-226	B	6

## Sheet: Lufu 60 min
Tyloxapol													Saline
Patient No	Group	Visite	Time	FVC	FVC	FEV1	FEV1	FEV1/FVC	MEF 25	RV	RV/TLC		Patient No	Group	Visite	Time	FVC	FVC	FEV1	FEV1	FEV1/FVC	MEF 25	RV	RV/TLC
				L	%	L	%	L	%	%	%						L	%	L	%	L	%	%	%
VISITE 1+4,
Patient-202	A	1	60 min	2.88	66	1.23	36	42.46	17	507	208		Patient-201	B	1	60 min	3.53	104	2.56	88	72.68	34	136	118
Patient-204	A	1											Patient-205	B	1	60 min	3.86	108	2.19	71	56.9	32	216	146
Patient-206	A	1	60 min	3.38	75	2.17	60	62.91	25	144	139		Patient-207	B	1	60 min	5.05	101	2.95	73	58.31	25	183	137
Patient-208	A	1	60 min	1.42	51	0.89	38	47.58	28	162	154		Patient-211	B	1	60 min	2.6	84	1.12	47	42.96	21	149	140
Patient-210	A	1	60 min	1.82	69	0.86	39	47.41	17	215	170		Patient-212	B	1	60 min	3.12	96	1.34	49	42.75	17	183	137
Patient-215	A	1	60 min	5.37	102	2.64	64	48.54	24	95	64		Patient-213	B	1	60 min	4	94	2.04	62	50.9	21	139	120
Patient-216	A	1	60 min	2.18	63	1.5	57	67.72	26	108	133		Patient-214	B	1	60 min	3.34	77	2.49	74	74.69	44	143	133
Patient-219	A	1	60 min	3.56	89	2.69	88	75.73	48	122	114		Patient-217	B	1	60 min	2.69	88	1.7	66	63.24	21	166	142
Patient-227	A	1	60 min	3.6	81	2.4	68	65.28	26	150	136		Patient-220	B	1	60 min	3.19	80	1.62	53	50.64	24	169	140
Patient-228	A	1	60 min	3.88	79	2.23	57	56.23	25	266	180		Patient-221	B	1	60 min	3.58	88	2.82	87	78.81	47	118	119
													Patient-226	B	1
Patient-201	B	4	60 min	3.24	96	2.27	78	70.01	32	147	129		Patient-202	A	4	60 min	3.34	76	1.18	35	35.39	13	410	193
Patient-205	B	4	60 min	3.72	104	2.12	69	56.89	22	249	158		Patient-204	A	4
Patient-207	B	4	60 min	4.81	97	2.69	67	56.03	25	187	143		Patient-206	A	4	60 min	3.23	72	1.91	53	53.87	19	137	134
Patient-211	B	4	60 min	1.84	59	0.72	30	39.04	20	213	178		Patient-208	A	4	60 min	2.42	87	1.18	50	47.35	16	115	118
Patient-212	B	4	60 min	2.79	86	1.24	45	44.32	17	220	154		Patient-210	A	4	60 min	1.87	71	0.97	44	43.61	15	132	131
Patient-213	B	4	60 min	3.56	84	1.73	52	48.48	21	136	126		Patient-215	A	4	60 min	5.07	97	2.39	57	47.04	25	63	67
Patient-214	B	4	60 min	3.48	80	2.69	80	77.12	45	152	134		Patient-216	A	4	60 min	2.29	67	1.63	62	70.96	26	102	132
Patient-217	B	4	60 min	2.53	83	1.71	66	66.5	24	109	118		Patient-219	A	4	60 min	3.47	87	2.65	87	71.52	47	112	107
Patient-220	B	4	60 min	2.51	61	1.18	36	39.76	18	210	167		Patient-227	A	4	60 min	3.24	73	2.13	60	63.72	23	115	125
Patient-221	B	4	60 min	3.48	86	2.79	86	76.31	57	115	116		Patient-228	A	4	60 min	4.61	94	2.58	66	52.5	26	221	151
Patient-226	B	4
VISITE 2+5,
Patient-202	A	2	60 min	2.86	65	1.07	31	37.49	16	730	221		Patient-201	B	2	60 min	3.53	104	2.65	91	75.18	42	129	114
Patient-204	A	2											Patient-205	B	2	60 min	3.83	107	2.2	72	57.57	26	161	126
Patient-206	A	2	60 min	3.47	77	2.04	57	58.95	18	120	126		Patient-207	B	2	60 min	5.26	106	3	75	57.01	25	174	131
Patient-208	A	2	60 min	2.18	78	1.12	48	45.98	16	167	141		Patient-211	B	2	60 min	2.83	92	1.18	50	41.75	20	140	132
Patient-210	A	2	60 min	2	76	0.92	42	45.96	13	141	141		Patient-212	B	2	60 min	3.21	99	1.4	51	43.59	19	171	132
Patient-215	A	2	60 min	5.51	105	2.69	65	48.55	23	191	131		Patient-213	B	2	60 min	4.03	95	1.99	60	49.42	20	155	126
Patient-216	A	2	60 min	2.17	63	1.51	57	65.84	22	103	128		Patient-214	B	2	60 min	3.04	70	1.75	52	57.48	20	144	139
Patient-219	A	2	60 min	3.67	92	2.77	91	75.46	44	125	114		Patient-217	B	2	60 min	2.36	77	1.33	51	56.42	18	221	168
Patient-227	A	2	60 min	3.1	70	1.89	53	57.73	17	248	172		Patient-220	B	2	60 min	3.04	74	1.71	53	56.13	21	229	171
Patient-228	A	2	60 min	4.23	86	2.31	59	52.25	23	224	160		Patient-221	B	2	60 min	3.6	89	2.95	91	81.45	69	82	95
													Patient-226	B	2
Patient-201	B	5	60 min	3.02	89	2.17	75	72	34	158	139		Patient-202	A	5	60 min	2.75	63	1.26	37	45.68	20	187	162
Patient-205	B	5	60 min	3.48	97	1.93	63	55.46	20	236	159		Patient-204	A	5
Patient-207	B	5	60 min	4.84	97	2.63	65	53.76	23	192	143		Patient-206	A	5	60 min	3.24	72	1.98	55	54.34	20	110	117
Patient-211	B	5	60 min	2.34	76	0.96	41	36.5	20	159	143		Patient-208	A	5	60 min	2.44	88	1.27	54	47.08	20	192	143
Patient-212	B	5	60 min	2.52	77	1.08	39	37.29	20	223	153		Patient-210	A	5	60 min	1.93	73	1.04	47	51.42	15	214	164
Patient-213	B	5	60 min	3.86	91	1.91	58	49.47	21	103	103		Patient-215	A	5	60 min	5.04	96	2.45	59	48.67	26	185	136
Patient-214	B	5	60 min	3.01	69	2.23	66	74.08	55	137	137		Patient-216	A	5	60 min	2.21	62	1.48	56	69.95	25	130	146
Patient-217	B	5	60 min	1.46	48	1.01	39	37.55	38	153	137		Patient-219	A	5	60 min	3.51	88	2.64	86	69.44	43	113	106
Patient-220	B	5	60 min	3.56	86	1.61	49	40.01	24	178	137		Patient-227	A	5	60 min	3.49	78	2.3	65	59.49	27	165	139
Patient-221	B	5	60 min	3.53	87	2.85	88	78.11	83	42	57		Patient-228	A	5	60 min	2.54	93	2.53	64	52.6	24	221	153
Patient-226	B	5
VISITE 3+6,
Patient-202	A	3	60 min	3.57	81	1.33	39	35.44	12	435	191		Patient-201	B	3	60 min	3.4	100	2.52	86	73.93	41	133	119
Patient-204	A	3											Patient-205	B	3	60 min	3.29	92	1.73	56	52.51	18	245	165
Patient-206	A	3	60 min	3.7	82	2.08	58	56.22	12	97	107		Patient-207	B	3	60 min	5.02	101	3.08	77	61.46	30	116	45
Patient-208	A	3	60 min	2.45	88	1.25	53	46.95	18	210	149		Patient-211	B	3	60 min	3.091	100	1.21	51	36.2	15	131	117
Patient-210	A	3	60 min	1.58	60	0.85	38	46.7	16	219	170		Patient-212	B	3	60 min	3.04	93	1.22	44	39.48	14	168	133
Patient-215	A	3	60 min	5.4	103	2.53	61	46.92	25	55	57		Patient-213	B	3	60 min	3.93	93	1.85	56	44.6	16	97	95
Patient-216	A	3	60 min	2.28	66	1.58	60	66.2	26	114	131		Patient-214	B	3	60 min	2.53	58	1.8	53	70.92	35	144	151
Patient-219	A	3	60 min	3.56	89	2.76	90	76.79	52	121	113		Patient-217	B	3	60 min	2.54	83	1.63	63	62.66	21	193	153
Patient-227	A	3	60 min	3.49	78	2.38	67	64.64	30	116	119		Patient-220	B	3	60 min	2.8	68	1.54	47	40.97	18	203	150
Patient-228	A	3	60 min	4.49	92	2.57	66	57.39	30	230	161		Patient-221	B	3	60 min	3.38	84	2.76	85	80.38	66	106	115
													Patient-226	B	3
Patient-201	B	6	60 min	3.29	97	2.39	82	72.8	37	149	129		Patient-202	A	6	60 min	2.99	68	1.15	34	38.43	14	185	156
Patient-205	B	6	60 min	3.81	106	2.1	68	55.13	26	237	153		Patient-204	A	6
Patient-207	B	6	60 min	4.68	94	2.8	70	59.82	27	206	152		Patient-206	A	6	60 min	3.46	77	2.26	63	60.81	25	116	119
Patient-211	B	6	60 min	1.88	61	0.73	31	32.43	18	98	124		Patient-208	A	6	60 min	2.52	90	1.29	55	48.9	18	180	141
Patient-212	B	6	60 min	2.78	86	1.25	45	44.77	18	200	149		Patient-210	A	6	60 min	1.83	69	0.98	45	52.79	16	275	180
Patient-213	B	6	60 min	3.65	86	1.81	55	48.54	19	153	130		Patient-215	A	6	60 min	5.03	96	2.38	57	47.39	27	291	168
Patient-214	B	6	60 min	2.57	59	2.08	62	81	29	174	161		Patient-216	A	6	60 min	2.13	62	1.43	55	62.21	24	77	110
Patient-217	B	6	60 min	2.46	81	1.64	63	61.2	20	179	147		Patient-219	A	6	60 min	3.45	86	2.55	83	67.19	50	112	105
Patient-220	B	6	60 min	3.57	87	1.79	55	44.86	21	190	142		Patient-227	A	6	60 min	3.18	71	2.06	58	60.44	21	135	134
Patient-221	B	6	60 min	3.34	82	2.67	82	76.4	50	37	53		Patient-228	A	6	60 min	3.38	69	1.92	49	53.88	21	214	172
Patient-226	B	6

## Sheet: CAT Likert
Tyloxapol												Saline
Patient No	Group	CAT			Likert 1			Likert 2				Patient No	Group	CAT			Likert 1			Likert 2
		V1/4	V2/5	V3/6	V1/4	V2/5	V3/6	V1/4	V2/5	V3/6				V1/4	V2/5	V3/6	V1/4	V2/5	V3/6	V1/4	V2/5	V3/6
202	A	27	28	29	5	3	3	5	3	3		201	B	12	14	12	1	1	1	1	1	1
204	A											205	B	17	22	24	5	5	5	1	4	5
206	A	17	17	15	1	1	2	1	1	2		207	B	23	20	20	1	1	1	1	3	1
208	A	25	28	26	1	1	1	1	1	1		211	B	22	22	25	3	3	2	4	3	2
210	A	22	23	20	6	3	3	6	4	4		212	B	26	21	22	4	2	2	5	4	5
215	A	16	15	15	1	5	4	1	4	4		213	B	10	10	10	5	5	3	7	5	3
216	A	16	13	13	7	1	5	4	1	4		214	B	32	18	24	3	3	2	3	2	3
219	A	18	19	19	2	2	2	3	2	2		217	B	29	27	26	4	4	5	2	3	5
227	A	21	19	18	5	1	1	5	2	2		220	B	29	18	17	1	1	4	1	3	4
228	A	16	10	11	2	3	3	2	3	3		221	B	23	23	24	2	3	4	2	3	5
201	B	10	10	12	1	1	1	3	2	2		226	B
205	B	18	16	13	3	5	6	5	6	6		202	A	28	28	27	3	5	3	3	4	3
207	B	18	17	22	2	4	5	5	4	5		204	A
211	B	25	22	23	5	4	2	6	4	3		206	A	19	17	15	2	3	4	3	3	4
212	B	23	23	25	3	4	4	5	5	4		208	A	23	22	25	1	1	1	1	1	1
213	B	13	10	12	2	3	3	2	3	4		210	A	22	18	22	3	1	2	3	1	2
214	B	24	14	18	3	4	4	3	4	4		215	A	17	15	15	1	3	3	1	3	3
217	B	26	24	25	3	5	5	3	2	5		216	A	8	9	11	5	5	2	5	5	2
220	B	23	21	19	1	4	1	1	4	2		219	A	22	20	18	1	2	3	1	2	3
221	B	26	20	13	5	4	6	6	5	6		227	A	15	18	14	2	5	5	3	4	5
226	B											228	A	18	14	17	3	3	4	3	3	4

[truncated: 1 more sheets: SGRQ-BDI-TDI]
